# Supplementary material for: Dimeric structure of the uracil:proton symporter UraA provides mechanistic insights into the SLC4/23/26 transporters
Source: PubMed Central journal article supplement (PMC5539350; doi:10.1038/cr.2017.83), 2017-06-16
Supplement: cr201783x6.pdf [file cr201783x6.pdf]

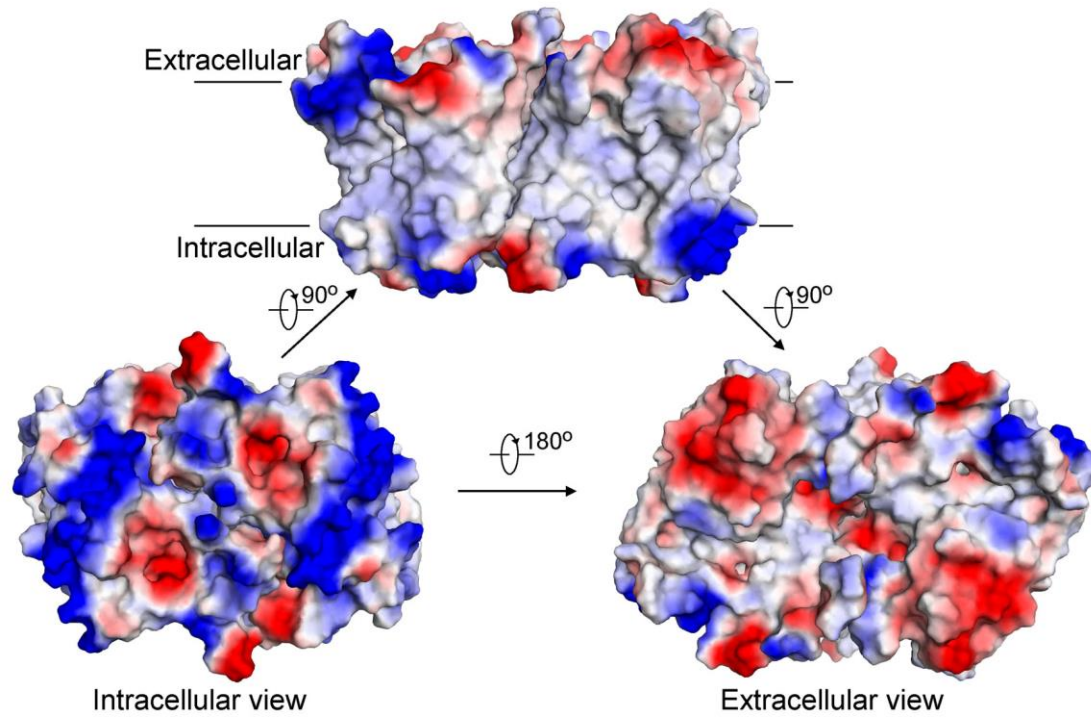

**Supplementary information, Figure S6** The surface contour of UraA dimer shown as electrostatic potential.

The extracellular surface has a larger area than the intracellular side. The intracellular surface is enriched of positive charged residues, observing the “positive-inside” rule for integral membrane proteins.
