# Supplementary material for: Dimeric structure of the uracil:proton symporter UraA provides mechanistic insights into the SLC4/23/26 transporters
Source: PubMed Central journal article supplement (PMC5539350; doi:10.1038/cr.2017.83), 2017-06-16
Supplement: cr201783x7.pdf [file cr201783x7.pdf]

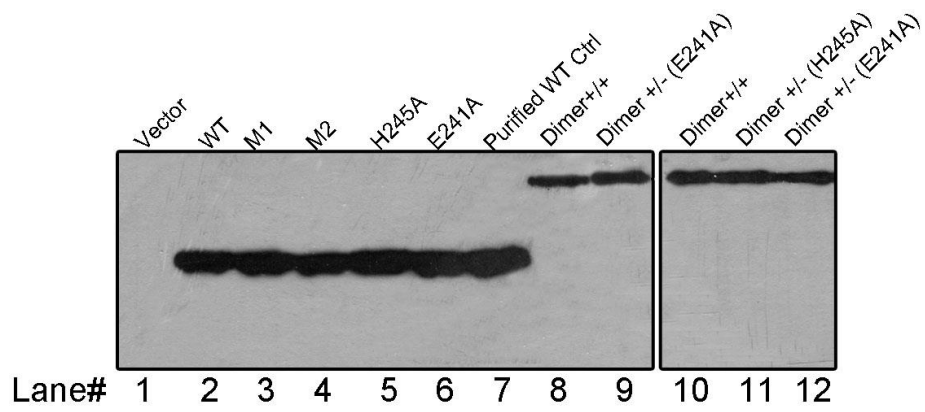

**Supplementary information, Figure S7** The expression level of UraA variants.

*E.coli*  $\Delta$ *uraA* was transformed with the indicated UraA variants in the pQLINK vector.

Same amount of cells were applied to SDS-PAGE followed by western-blot using antibodies against His<sub>6</sub> tag.
