# Supplementary material for: Dimeric structure of the uracil:proton symporter UraA provides mechanistic insights into the SLC4/23/26 transporters
Source: PubMed Central journal article supplement (PMC5539350; doi:10.1038/cr.2017.83), 2017-06-16
Supplement: cr201783x13.pdf [file cr201783x13.pdf]

---

**Supplementary information, Table S1** Statistics of data collection and refinement

---

**Data collection**

---

|                                    |                       |
|------------------------------------|-----------------------|
| Space Group                        | C 2 2 2 <sub>1</sub>  |
| Unit Cell                          |                       |
| <i>a</i> , <i>b</i> , <i>c</i> (Å) | 74.72, 134.73, 143.45 |
| $\alpha$ , $\beta$ , $\gamma$ (°)  | 90.00, 90.00, 90.00   |

|                                   |                     |
|-----------------------------------|---------------------|
| Number of molecules in ASU        | 1                   |
| Wavelength (Å)                    | 1.0000              |
| Resolution (Å)                    | 40~2.50 (2.59~2.50) |
| R <sub>merge</sub> (%)            | 11.7 (55.8)         |
| I/ $\sigma$ I                     | 18.5 (2.8)          |
| Completeness (%)                  | 98.0 (98.5)         |
| Number of measured reflections    | 81,965              |
| Number of unique reflections      | 24,923              |
| Redundancy                        | 3.3 (3.3)           |
| Wilson B factor (Å <sup>2</sup> ) | 36.6                |

**Refine**

|                         |             |
|-------------------------|-------------|
| R/R <sub>free</sub> (%) | 22.57/24.69 |
|-------------------------|-------------|

## Number of atoms

|                    |      |
|--------------------|------|
| Protein main chain | 1633 |
| Protein side chain | 1373 |
| Protein all atoms  | 3006 |
| Water molecules    | 42   |
| Other entities     | 112  |
| All atoms          | 3160 |

Average B value (Å<sup>2</sup>)

|                    |      |
|--------------------|------|
| Protein main chain | 49.8 |
| Protein side chain | 52.1 |
| Protein all atoms  | 50.9 |
| Water molecules    | 42.9 |
| Other entities     | 65.7 |
| All atoms          | 51.3 |

## R.m.s deviations from ideal values

|           |       |
|-----------|-------|
| Bonds (Å) | 0.009 |
| Angle (°) | 1.451 |

## Ramachandran plot statistics (%)

|                      |      |
|----------------------|------|
| Most favorable       | 93.3 |
| Additionally allowed | 6.7  |
| Generously allowed   | 0    |
| Disallowed           | 0    |

---

Values in parentheses are for the highest resolution shell.  $R_{merge} = \frac{\sum_h \sum_i |I_{h,i} - I_h|}{\sum_h \sum_i I_{h,i}}$ , where  $I_h$  is the mean intensity of the  $i$  observations of symmetry related reflections of  $h$ .  $R = \frac{\sum |F_{obs} - F_{calc}|}{\sum F_{obs}}$ , where  $F_{calc}$  is the calculated protein structure factor from the atomic model (R<sub>free</sub> was calculated with 5% of the reflections selected).
